# Supplementary material for: Accumulation of plasmacytoid dendritic cell is associated with a treatment response to DNA-damaging treatment and favorable prognosis in lung adenocarcinoma
Source: Front Immunol. 2023 Jun 26;14:1154881. doi: 10.3389/fimmu.2023.1154881 (PMC10330699; doi:10.3389/fimmu.2023.1154881)
Supplement: Supplementary file 9 [file Table_2.xlsx]

## Sheet: Suppl_2_Materials
Supplementary table 2. Antibodies and experimental conditions used for this study.
Gene Name	Antibody Name	Vendor	Catalog #	Dilution
LILA4	Anti-LILRA4 antibody produced in rabbit	Sigma-Aldrich	HPA049418	1:80*
TLR9	TLR9 Antibody	ThermoFisher Scientific	PA5-27258	1:50*
CCL2	CCL2/MCP1 Antibody (2D8)	Novus Biologicals	NBP2-22115	1:1,000
ER-tracker	ER-Tracker™ Red (BODIPY® TR Glibenclamide), for live-cell imaging 100ug	invitrogen	E34250	1:1,000
Alexa-488	Ant-rabbit IgG(H+L), F(ab')2 Fragment (Alexa Fluor 488 Conjugate)	Cell Signaling Technology	#4412	1:500
Alexa-633	Alexa-Fluor 633 goat anti-rabbit IgG (H+L)	Invitrogen	A21070	1:500
Mounting with DAPI for IF	ProLong Gold Antifade Mountant with DAPI 10ml	invitrogen	P36931
Mounting for IHC	VectaMount® Permanent Mounting Medium	Vector Laboratories	H-5000-60
Fluorescence Enhancer	Alexa Fluor™ 647 Tyramide SuperBoost™ Kit, goat anti-rabbit IgG	ThermoFisher Scientific	B40926
Autofluorescence Quencher	Vector® TrueVIEW® Autofluorescence Quenching Kit	Vector Laboratories	sp-8400-15
IHC kit	EnVision Detection SystemsPeroxidase/DAB, Rabbit/Mouse	DaKo	k5007
* This concentration is for IF staining. For IHC, both antibody were diluted at 1:100.
